# Supplementary material for: Design of an untethered magbot: mimicking fruit fly larvae using magnetothermal actuation
Source: Research Square preprint supplement (doi:10.21203/rs.3.rs-1347144/v1), 2022-03-01
Supplement: Supplementary file 1 [file bd18f15b0d6af4a5e7cb1d4d.pdf]

## SUPPLEMENTARY MATERIALS

### **Design of an untethered magbot: mimicking fruit fly larvae using magnetothermal actuation**

Lin Xu<sup>1\*</sup>, Siyuan Liu<sup>1\*</sup>, Robert Wagner<sup>2\*</sup>, Qingrui He<sup>1</sup>, Xiang Zou<sup>1</sup>, Yu Fu<sup>1</sup>, Xingling Shi<sup>3</sup>,  
Jianning Ding<sup>1†</sup>, Dongliang Zhao<sup>4†</sup>, Franck Vernerey<sup>2†</sup>

<sup>1</sup>Institute of Intelligent Flexible Mechatronics, Jiangsu University, Zhenjiang 212013, P. R. China

<sup>2</sup>Department of Mechanical Engineering & Material Science and Engineering Program, University of Colorado at Boulder, Boulder 80309-0428, USA

<sup>3</sup>School of Materials Science and Engineering, Jiangsu University of Science and Technology, Zhenjiang 212003, P. R. China

<sup>4</sup>School of Energy and Environment, Southeast University, Nanjing 210096, P. R. China

\*These authors contributed equally to this work.

†Corresponding author. Email: dingjn@ujs.edu.cn (J.D.); Email: dongliang\_zhao@seu.edu.cn (D.Z.); franck.vernerey@colorado.edu (V.F.)

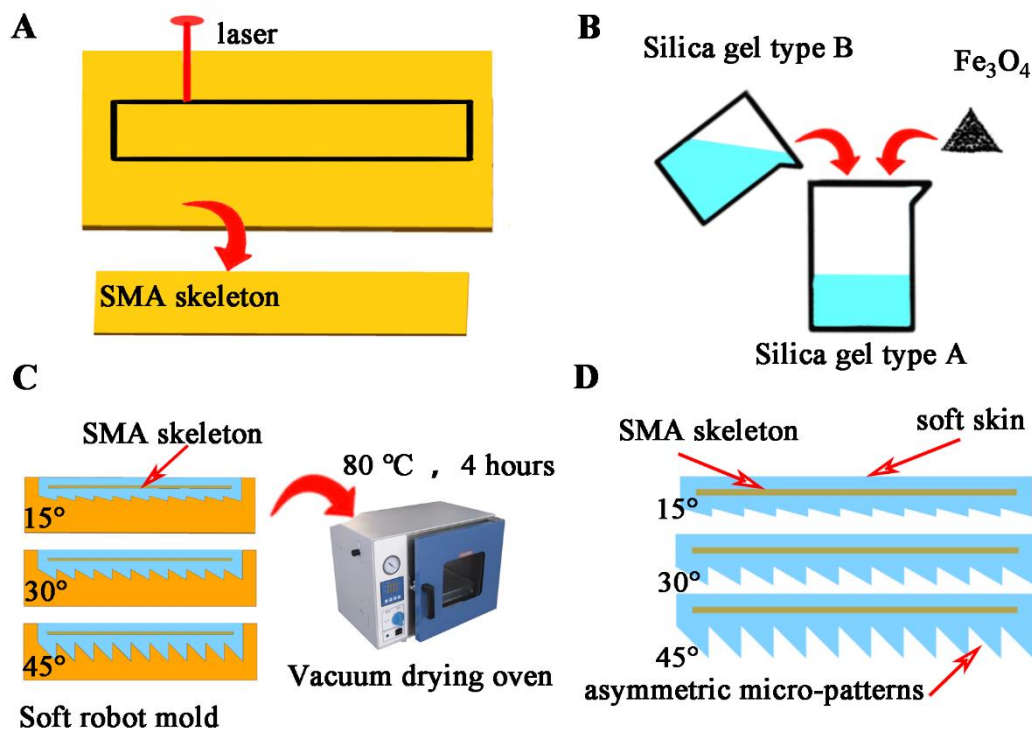

**Fig. S1. Design and manufacture of magbot.** (A) Fabrication of SMA skeleton. (B) Fabrication of magnetic silica gel. (C) magnetic skin with asymmetric micro-patterns. (D) Magbots with asymmetric micro-patterns of  $15^\circ$ ,  $30^\circ$  and  $45^\circ$ .

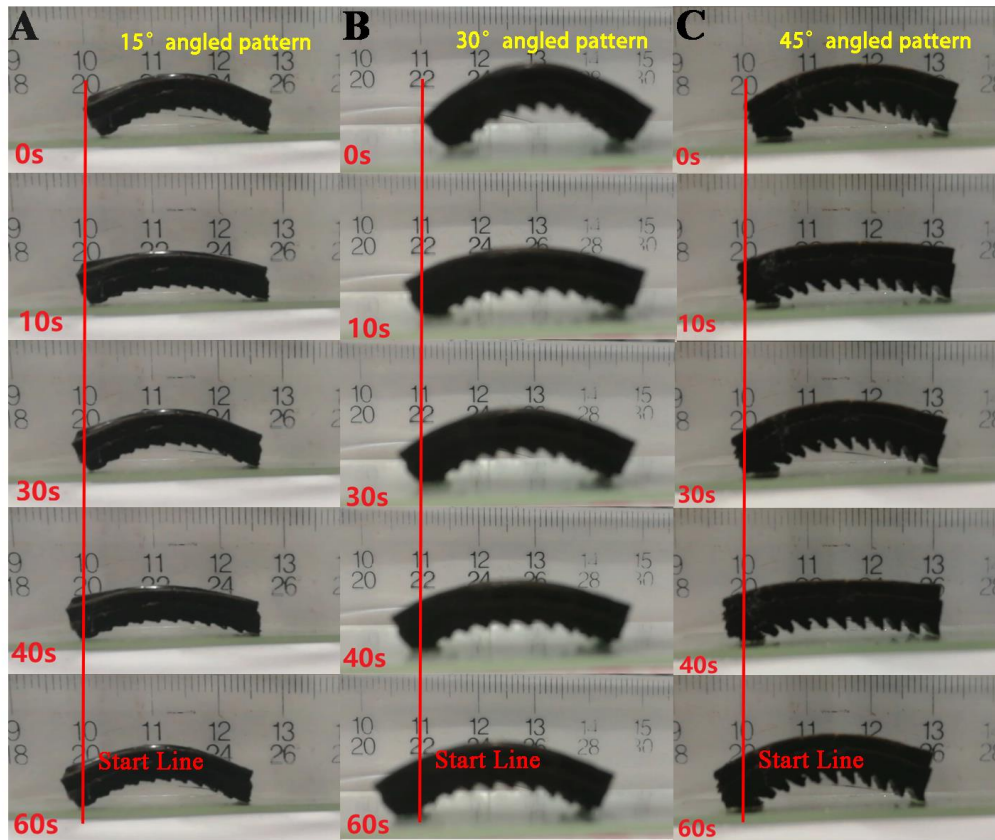

**Fig. S2.** (A) Actual motion state of 15° angled pattern magbot. (B) Actual motion state of 30° angled pattern magbot. (C) Actual motion state of 45° angled pattern magbot.

26 **Video Legend**

27 **Movie S1:** Unloaded magbot with 15° pattern angle exhibiting directional motion.

28 **Movie S2:** Unloaded magbot with 30° pattern angle exhibiting directional motion.

29 **Movie S3:** Unloaded magbot with 45° pattern angle exhibiting directional motion.

30 **Movie S4:** Magbot with 15° pattern carrying 1x bodyweight.

31 **Movie S5:** Magbot with 30° pattern carrying 1x bodyweight.

32 **Movie S6:** Magbot with 45° pattern carrying 1x bodyweight.

33 **Movie S7:** Magbot with 15° pattern carrying 2x bodyweight.

34 **Movie S8:** Magbot with 30° pattern angle carrying 2x bodyweight.

35 **Movie S9:** Magbot with 45° pattern angle carrying 2x bodyweight.

36 **Movie S10:** Magbot with 15° pattern angle carrying 3x bodyweight.

37 **Movie S11:** Magbot with 30° pattern angle carrying 3x bodyweight.

38 **Movie S12:** Magbot with 45° pattern angle carrying 3x bodyweight.
